# Supplementary material for: Comorbidities, intensity, frequency and duration of pain, daily functioning and health care seeking in local, regional, and widespread pain—a descriptive population-based survey (SwePain)
Source: Springer Nature journal article supplement (doi:10.1186/s12891-015-0631-1), 2015-07-23

**Additional file 1:** Manikins illustrating the three pain categories. A) an empty manikin with 45 regions, B) an example of the local pain category (LP; two regions with pain), C) an example of the regional pain category (RP; five regions with pain) and D) an example of the widespread pain category (WSP; 21 regions with pain). Areas with pain are in gray color.

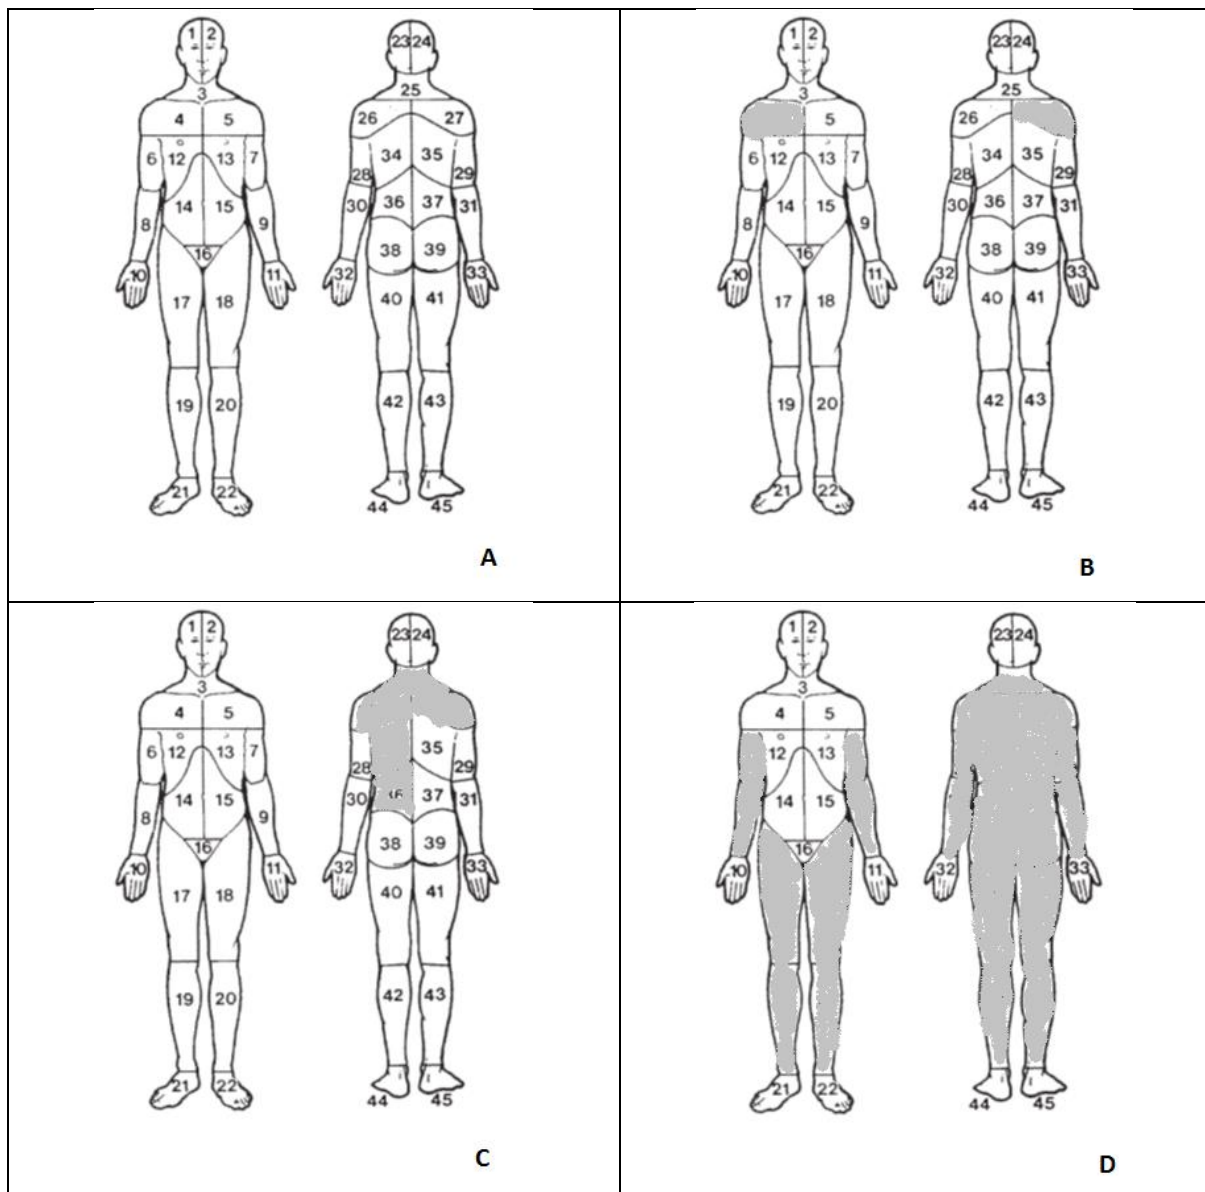

Supplement: MOESM1 [file 9752474]
